# Supplementary material for: (4-Methoxy)-phenoxy pentafluorocyclotriphosphazene as a novel flame retardant and overcharge protection additive for lithium-ion batteries
Source: Royal Society of Chemistry journal article supplement (doi:10.1039/c7ra09416g), 2017-01-01
Supplement: c7ra09416g1.pdf [file c7ra09416g1.pdf]

## Supporting Information

### **(4-methoxy)-phenoxy pentafluorocyclotriphosphazene as a novel flame retardant and overcharge protection additive for lithium- ion batteries**

Tao Huang, Xiangzhen Zheng, Guihuang Fang, Ying Pan, Wenguo Wang, Maoxiang Wu\*

*Key laboratory of Optoelectronic Materials Chemistry and Physics, Fujian Institute of Research on the Structure of Matter, Chinese Academy of Sciences, Fuzhou 350002, P. R. China.*

#### Supplementary Figures

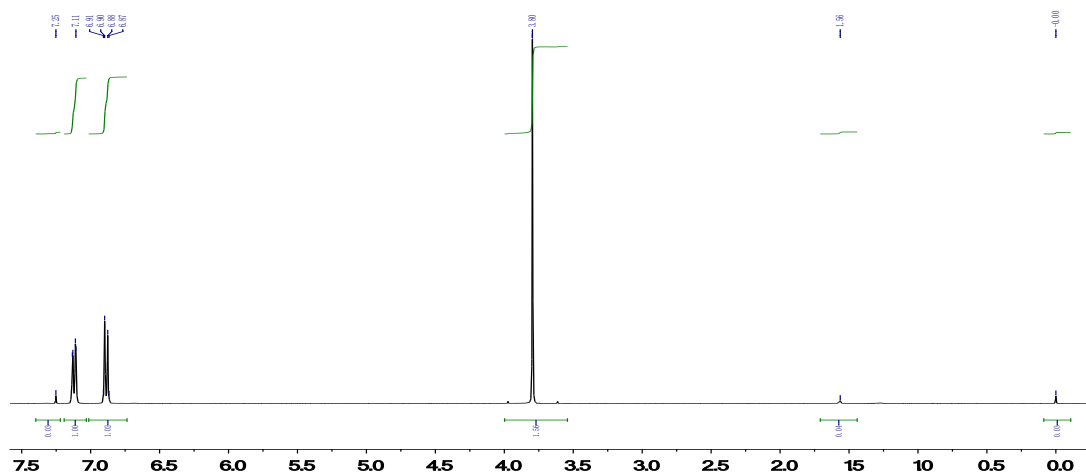

Fig. S1 <sup>1</sup>H-NMR data of 4-MPPFPP

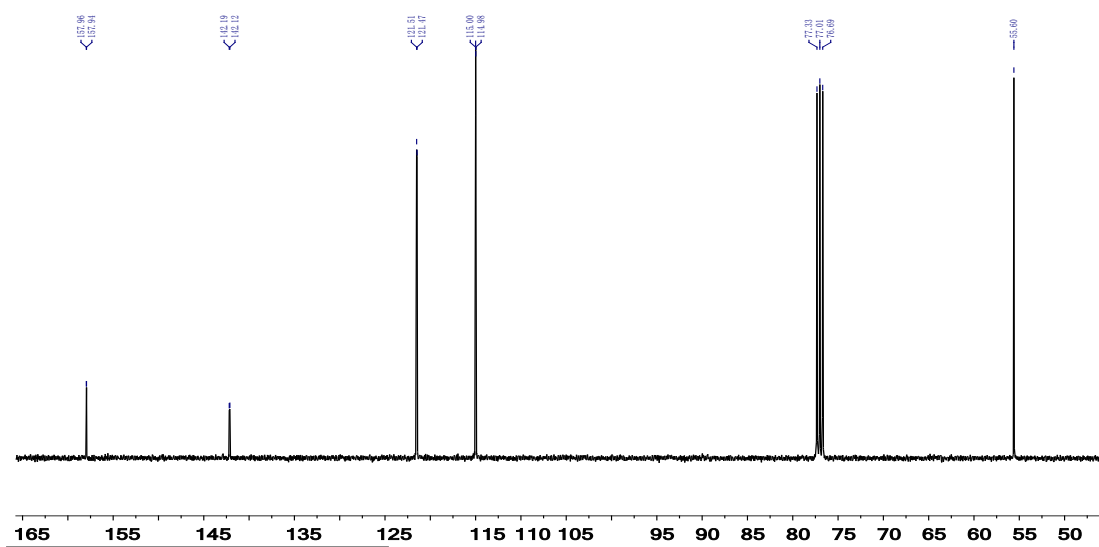

Fig. S2  $^{13}\text{C}$ -NMR data of 4-MPPFPP

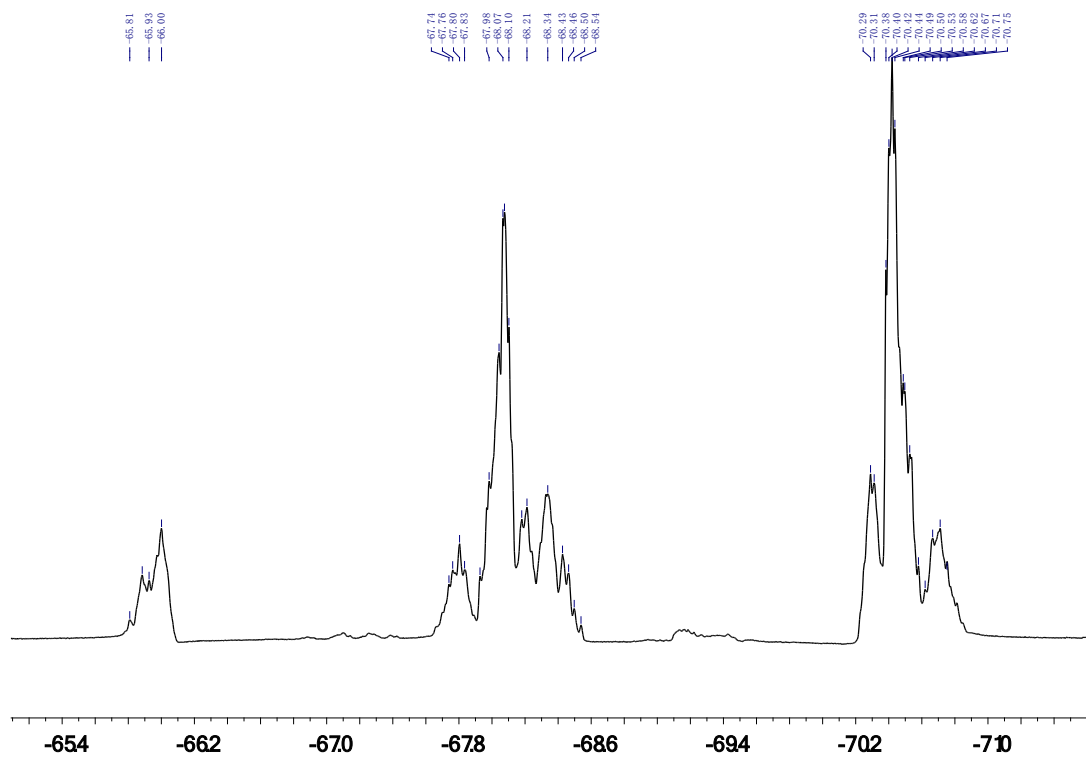

Fig. S3  $^{19}\text{F}$ -NMR data of 4-MPPFPP

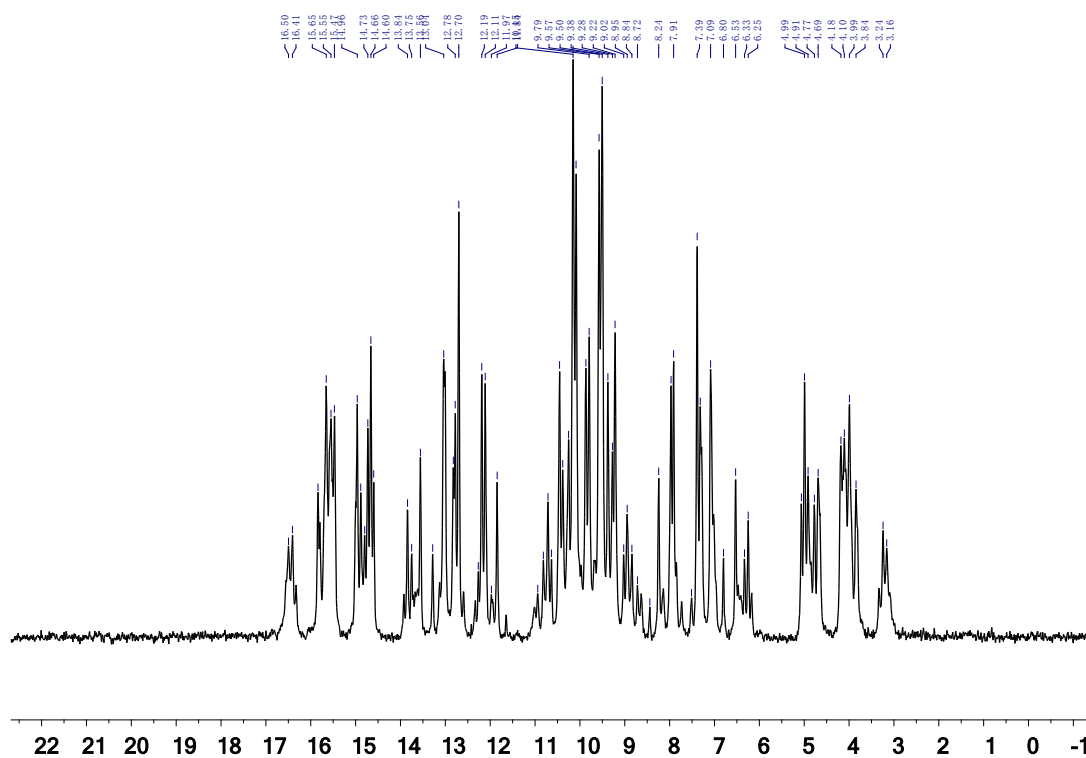

Fig. S4  $^{31}\text{P}$ -NMR data of 4-MPPFPP
